# Supplementary material for: A mechanism for detecting dishonest recommendation in indirect trust computation
Source: Springer Nature journal article supplement (doi:10.1186/1687-1499-2013-189), 2013-07-13
Supplement: 13638_2012_777_MOESM1_ESM.pdf [file 13638_2012_777_MOESM1_ESM.pdf]

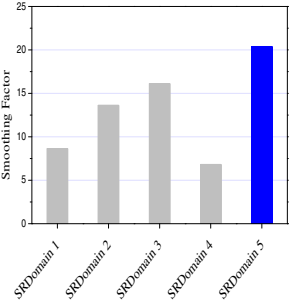

|            |                       |       |
|------------|-----------------------|-------|
| SRDomain 1 | {0.1}                 | 8.64  |
| SRDomain 2 | {0.1,0.2,0.3,0.8}     | 13.62 |
| SRDomain 3 | {0.1,0.2}             | 16.12 |
| SRDomain 4 | {0.1,0.2,0.3,0.8,0.6} | 6.82  |
| SRDomain 5 | {0.1,0.2,0.3}         | 20.4  |

(a)

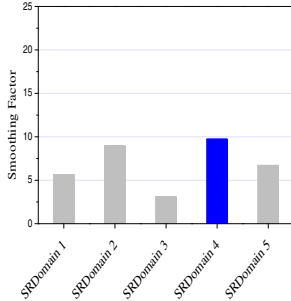

|            |                   |       |
|------------|-------------------|-------|
| SRDomain 1 | {0.1}             | 5.64  |
| SRDomain 2 | {0.1,0.2}         | 8.947 |
| SRDomain 3 | {0.1,0.2,0.6,0.8} | 3.09  |
| SRDomain 4 | {0.1,0.2,0.3}     | 9.733 |
| SRDomain 5 | {0.1,0.2,0.3,0.6} | 6.71  |

(b)

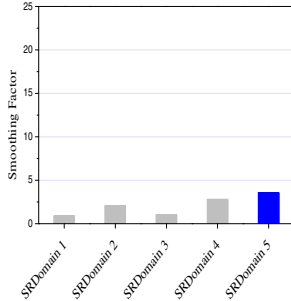

|            |                       |       |
|------------|-----------------------|-------|
| SRDomain 1 | {0.1}                 | 0.9   |
| SRDomain 2 | {0.1,0.2,0.3,0.8}     | 2.053 |
| SRDomain 3 | {0.1,0.2,0.3,0.8,0.7} | 1.037 |
| SRDomain 4 | {0.1,0.2}             | 2.8   |
| SRDomain 5 | {0.1,0.2,0.3}         | 3.57  |

(c)

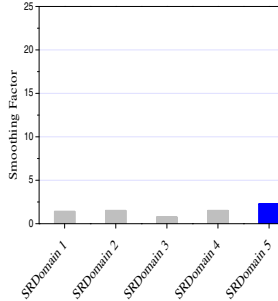

|            |                       |       |
|------------|-----------------------|-------|
| SRDomain 1 | {0.1}                 | 1.417 |
| SRDomain 2 | {0.1,0.2,0.3,0.8}     | 1.533 |
| SRDomain 3 | {0.1,0.2,0.3,0.8,0.7} | 0.77  |
| SRDomain 4 | {0.1,0.2}             | 1.528 |
| SRDomain 5 | {0.1,0.2,0.3}         | 2.27  |

(d)

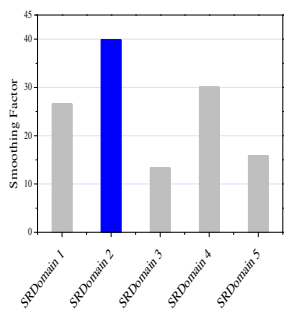

|            |                   |        |
|------------|-------------------|--------|
| SRDomain 1 | {0.9,1.0,0.8,0.1} | 26.62  |
| SRDomain 2 | {0.9,1.0,0.8}     | 39.9   |
| SRDomain 3 | {0.9,0.8,0.1,0.3} | 13.32  |
| SRDomain 4 | {0.9,1.0}         | 30.07  |
| SRDomain 5 | {0.9}             | 15.843 |

(e)

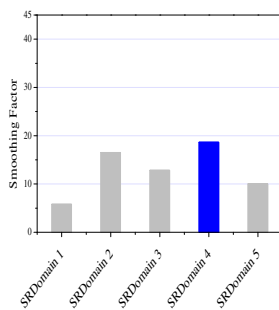

|            |                       |        |
|------------|-----------------------|--------|
| SRDomain 1 | {1.0,0.9,0.8,0.3,0.1} | 5.82   |
| SRDomain 2 | {1.0,0.9}             | 16.53  |
| SRDomain 3 | {1.0,0.9,0.8,0.3}     | 12.852 |
| SRDomain 4 | {1.0,0.9,0.8}         | 18.667 |
| SRDomain 5 | {1.0}                 | 10.027 |

(f)

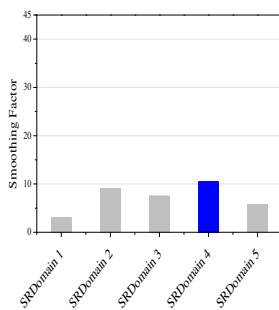

|            |                       |       |
|------------|-----------------------|-------|
| SRDomain 1 | {1.0,0.9,0.8,0.3,0.1} | 2.997 |
| SRDomain 2 | {1.0,0.9}             | 9.04  |
| SRDomain 3 | {1.0,0.9,0.8,0.3}     | 7.467 |
| SRDomain 4 | {1.0,0.9,0.8}         | 10.43 |
| SRDomain 5 | {1.0}                 | 5.76  |

(g)

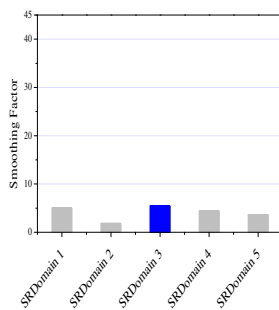

|            |                       |       |
|------------|-----------------------|-------|
| SRDomain 1 | {1.0,0.9}             | 5.038 |
| SRDomain 2 | {1.0,0.9,0.8,0.1,0.2} | 1.843 |
| SRDomain 3 | {1.0,0.9,0.8}         | 5.47  |
| SRDomain 4 | {1.0}                 | 4.41  |
| SRDomain 5 | {1.0,0.9,0.8,0.1}     | 3.667 |

(h)

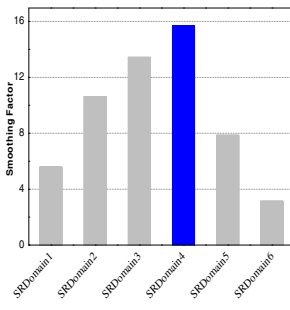

|            |                                |         |
|------------|--------------------------------|---------|
| SRDomain1: | {0.1}                          | : 5.58  |
| SRDomain2: | {0.1, 0.2}                     | : 10.61 |
| SRDomain3: | {0.1, 0.2, 1.0}                | : 13.43 |
| SRDomain4: | {0.1, 0.2, 1.0, 0.9}           | : 15.70 |
| SRDomain5: | {0.1, 0.2, 1.0, 0.9, 0.5}      | : 7.86  |
| SRDomain6: | {0.1, 0.2, 1.0, 0.9, 0.5, 0.6} | : 3.14  |

(i)

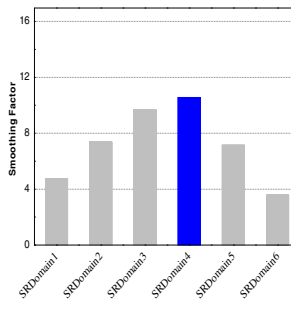

|            |                                |         |
|------------|--------------------------------|---------|
| SRDomain1: | {0.1}                          | : 4.75  |
| SRDomain2: | {0.1, 1.0}                     | : 7.38  |
| SRDomain3: | {0.1, 1.0, 0.2}                | : 9.69  |
| SRDomain4: | {0.1, 1.0, 0.2, 0.9}           | : 10.56 |
| SRDomain5: | {0.1, 1.0, 0.2, 0.9, 0.5}      | : 7.14  |
| SRDomain6: | {0.1, 1.0, 0.2, 0.9, 0.5, 0.7} | : 3.58  |

(j)

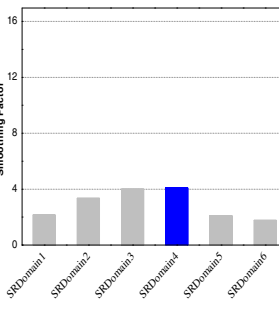

|            |                                |        |
|------------|--------------------------------|--------|
| SRDomain1: | {0.1}                          | : 2.15 |
| SRDomain2: | {0.1, 0.2}                     | : 3.35 |
| SRDomain3: | {0.1, 0.2, 1.0}                | : 4.00 |
| SRDomain4: | {0.1, 0.2, 1.0, 0.9}           | : 4.08 |
| SRDomain5: | {0.1, 0.2, 1.0, 0.9, 0.5}      | : 2.09 |
| SRDomain6: | {0.1, 0.2, 1.0, 0.9, 0.5, 0.6} | : 1.76 |

(k)

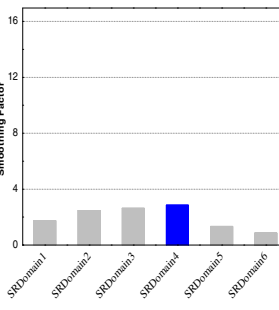

|            |                                |        |
|------------|--------------------------------|--------|
| SRDomain1: | {0.1}                          | : 1.75 |
| SRDomain2: | {0.1, 1.0}                     | : 2.46 |
| SRDomain3: | {0.1, 1.0, 0.2}                | : 2.64 |
| SRDomain4: | {0.1, 1.0, 0.2, 0.9}           | : 2.85 |
| SRDomain5: | {0.1, 1.0, 0.2, 0.9, 0.5}      | : 1.33 |
| SRDomain6: | {0.1, 1.0, 0.2, 0.9, 0.5, 0.6} | : 0.86 |

(l)
