# Supplementary material for: A mechanism for detecting dishonest recommendation in indirect trust computation
Source: Springer Nature journal article supplement (doi:10.1186/1687-1499-2013-189), 2013-07-13

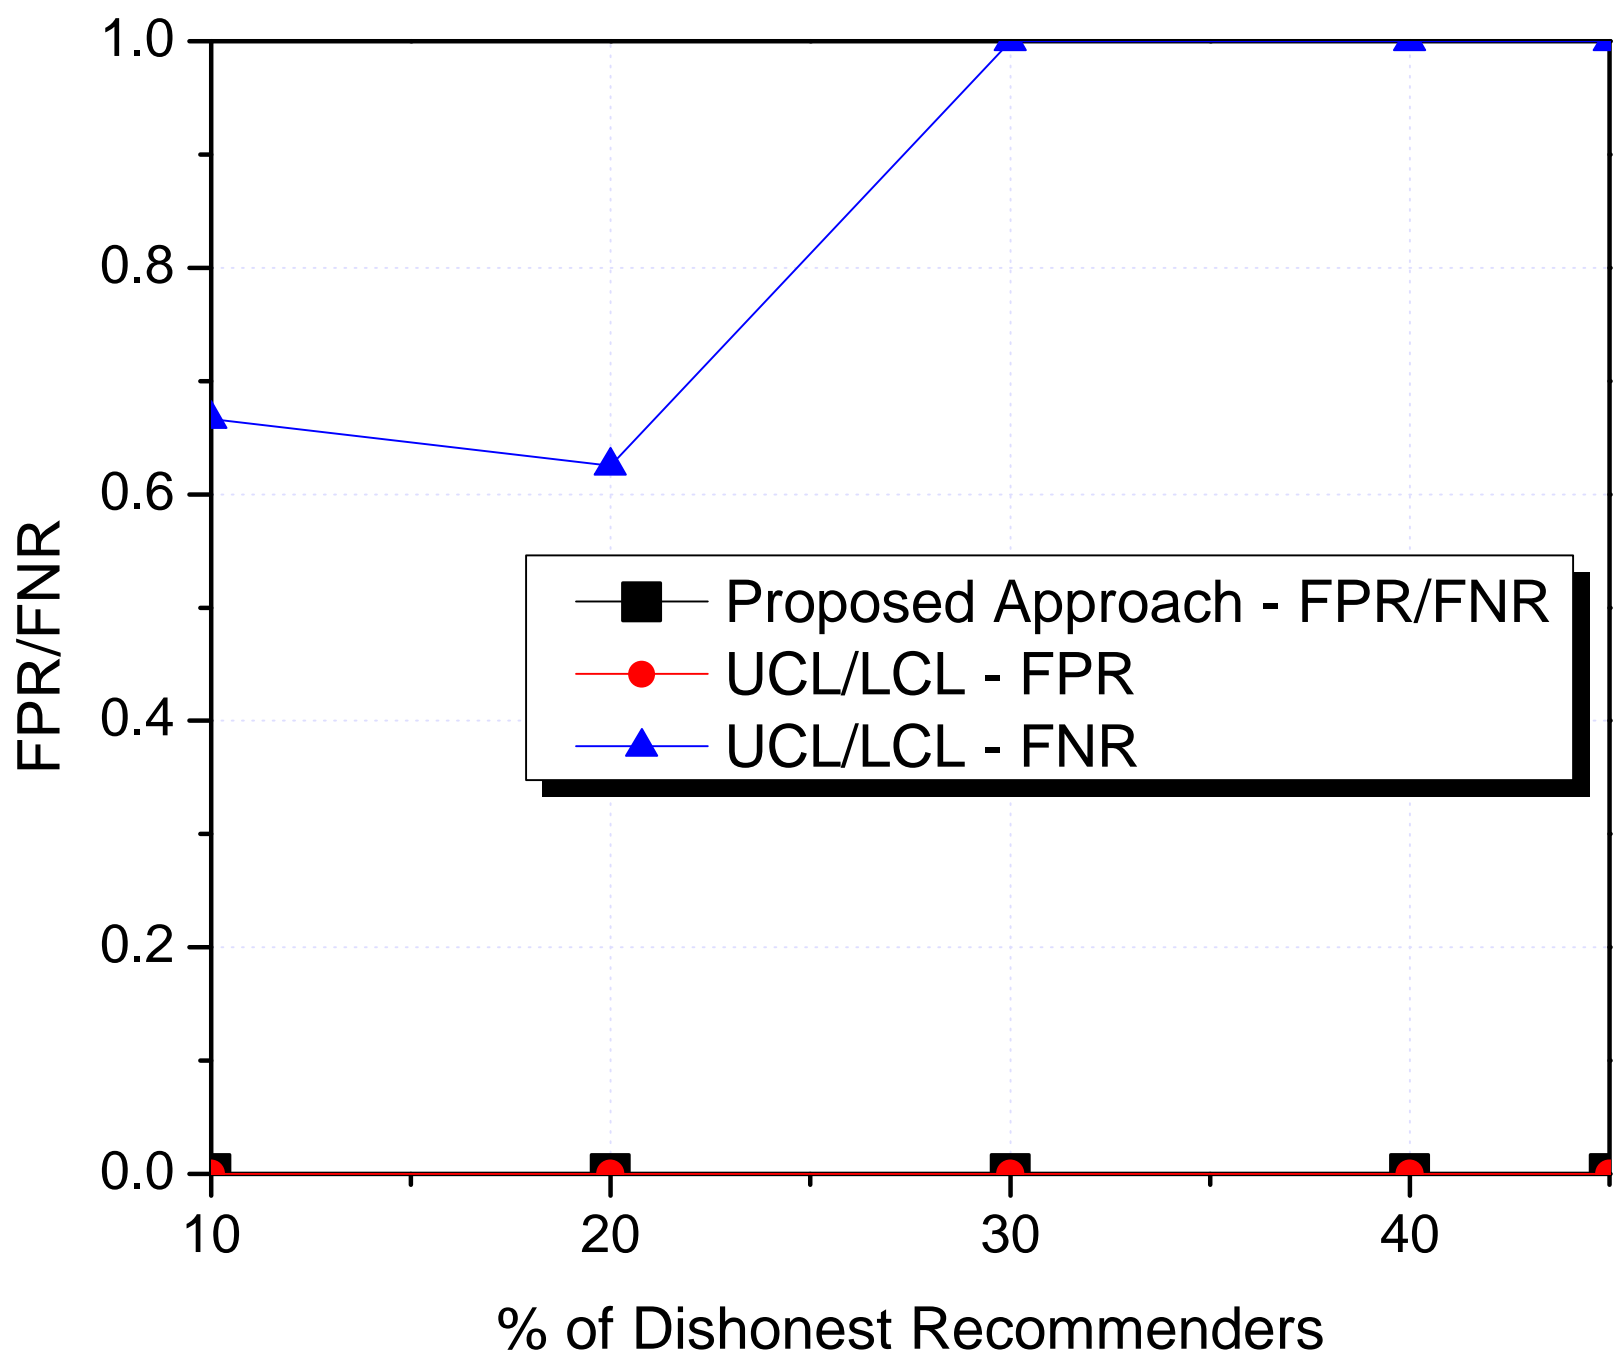

Supplement: 13638_2012_777_MOESM9_ESM.pdf [file 13638_2012_777_MOESM9_ESM.pdf]
