# Supplementary material for: A mechanism for detecting dishonest recommendation in indirect trust computation
Source: Springer Nature journal article supplement (doi:10.1186/1687-1499-2013-189), 2013-07-13
Supplement: 13638_2012_777_MOESM17_ESM.pdf [file 13638_2012_777_MOESM17_ESM.pdf]

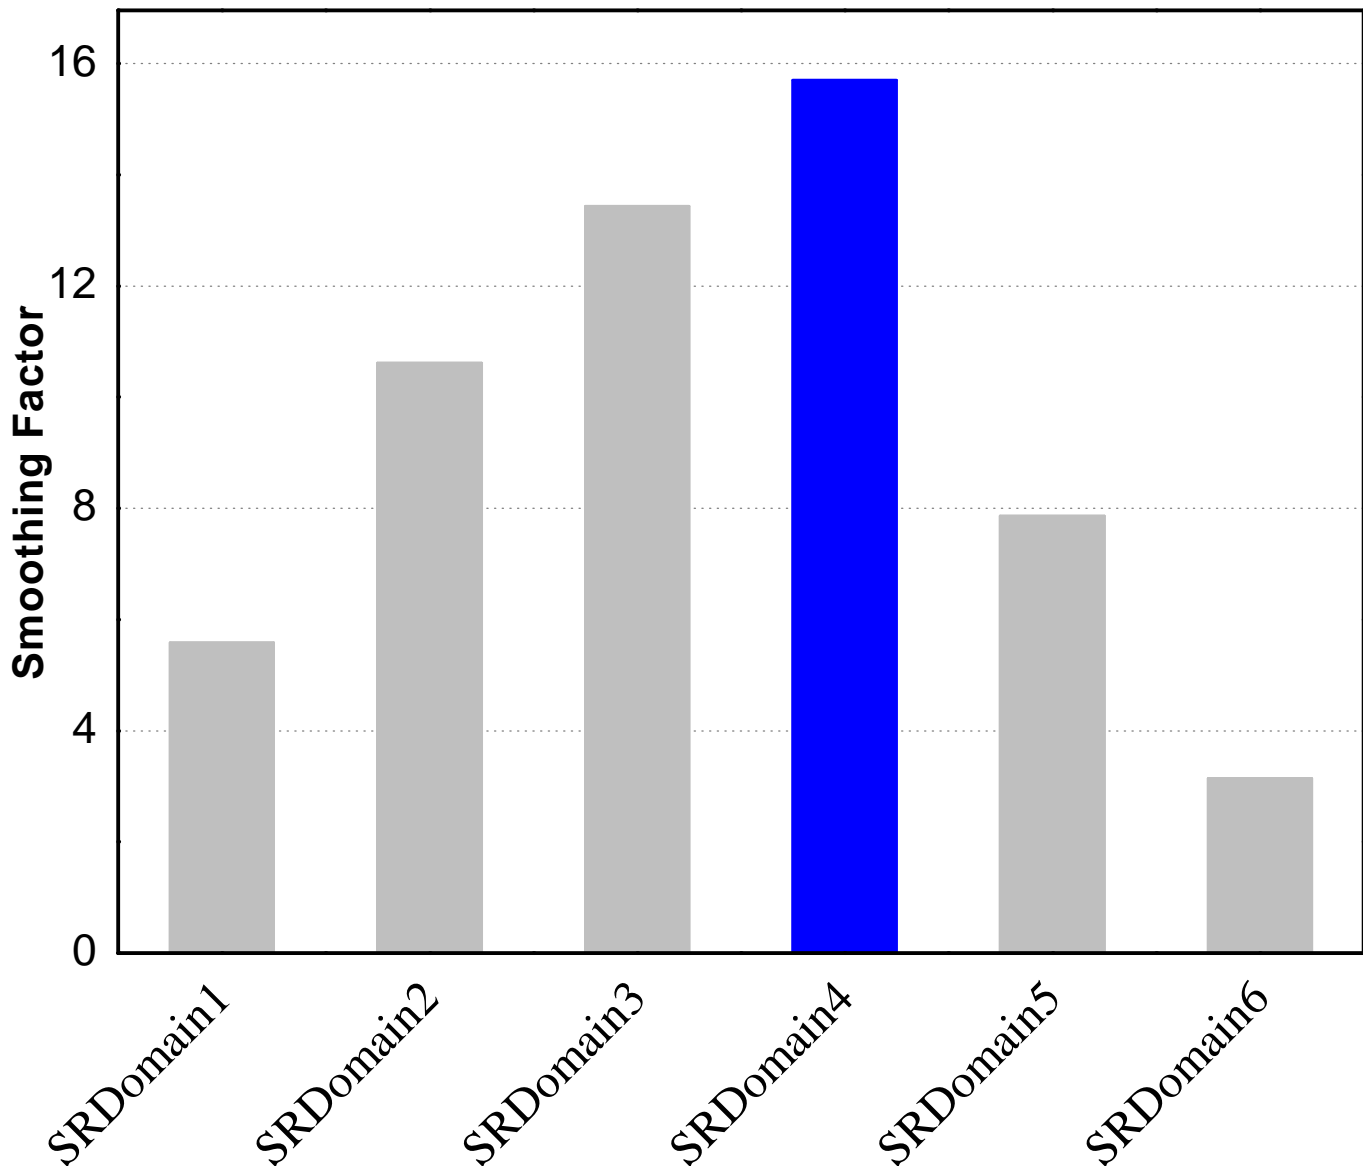

SRDomain1: {0.1} : 5.58  
SRDomain2: {0.1, 0.2} : 10.61  
SRDomain3: {0.1, 0.2, 1.0} : 13.43  
SRDomain4: {0.1, 0.2, 1.0, 0.9} : 15.70  
SRDomain5: {0.1, 0.2, 1.0, 0.9, 0.5} : 7.86  
SRDomain6: {0.1, 0.2, 1.0, 0.9, 0.5, 0.6} : 3.14
