# Supplementary material for: A mechanism for detecting dishonest recommendation in indirect trust computation
Source: Springer Nature journal article supplement (doi:10.1186/1687-1499-2013-189), 2013-07-13
Supplement: 13638_2012_777_MOESM19_ESM.pdf [file 13638_2012_777_MOESM19_ESM.pdf]

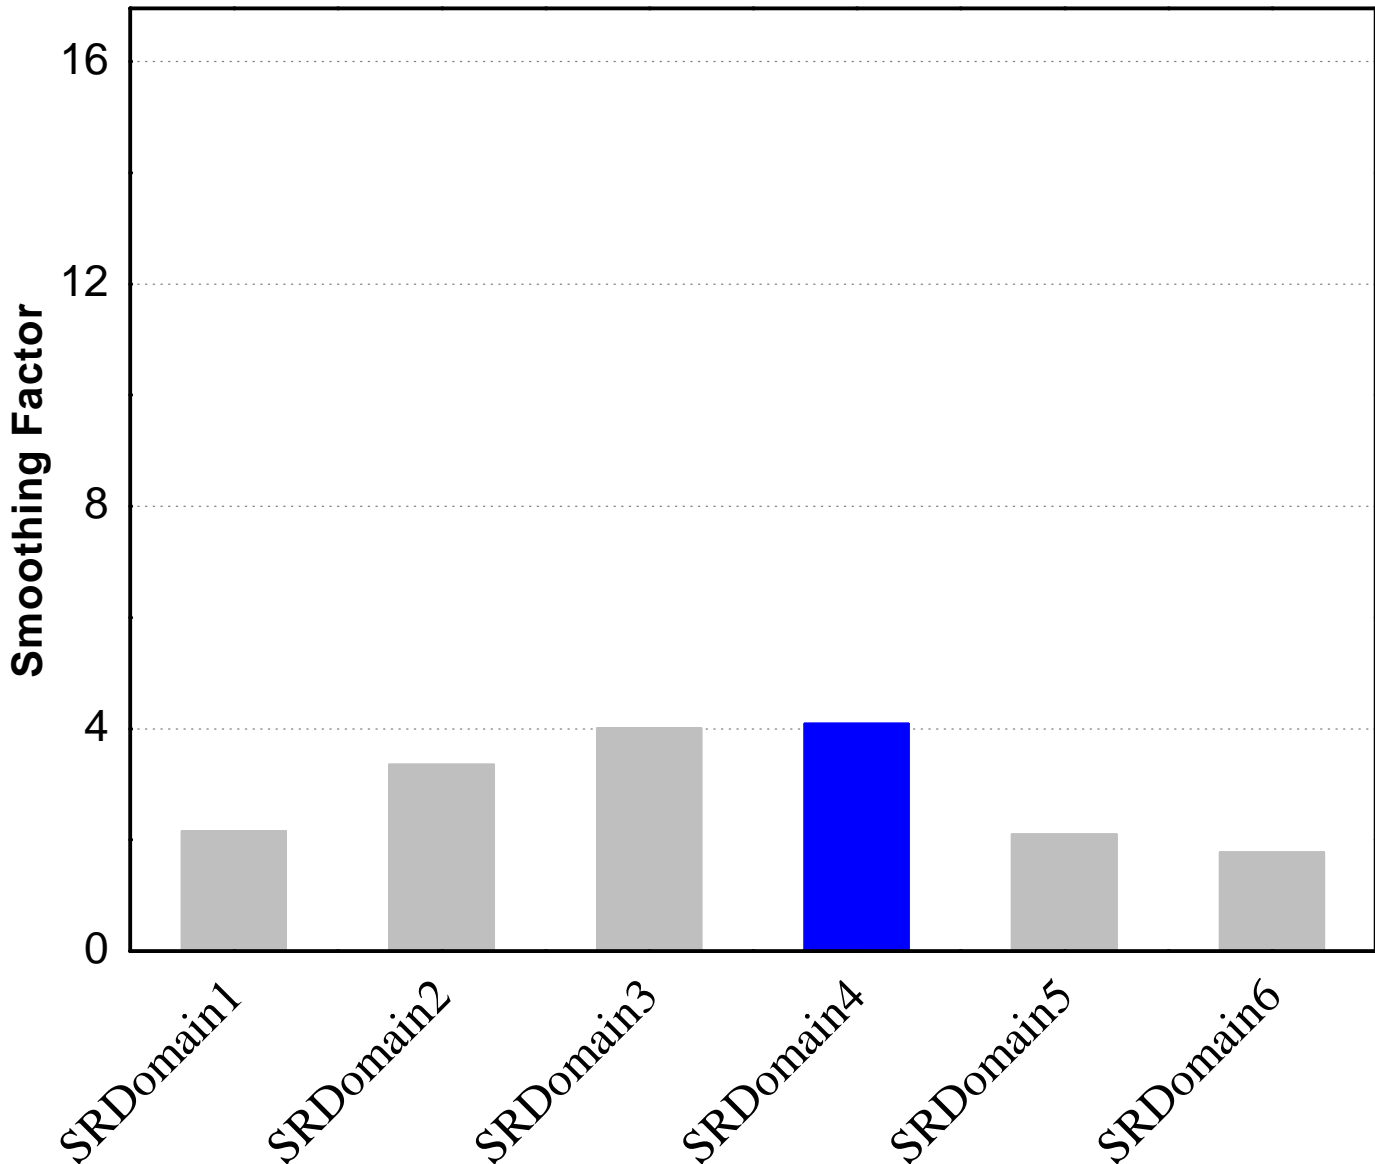

SRDomain1: {0.1} : 2.15

SRDomain2: {0.1, 0.2} : 3.35

SRDomain3: {0.1, 0.2, 1.0} : 4.00

SRDomain4: {0.1, 0.2, 1.0, 0.9} : 4.08

SRDomain5: {0.1, 0.2, 1.0, 0.9, 0.5} : 2.09

SRDomain6: {0.1, 0.2, 1.0, 0.9, 0.5, 0.6} : 1.76
