# Supplementary material for: A mechanism for detecting dishonest recommendation in indirect trust computation
Source: Springer Nature journal article supplement (doi:10.1186/1687-1499-2013-189), 2013-07-13
Supplement: 13638_2012_777_MOESM20_ESM.pdf [file 13638_2012_777_MOESM20_ESM.pdf]

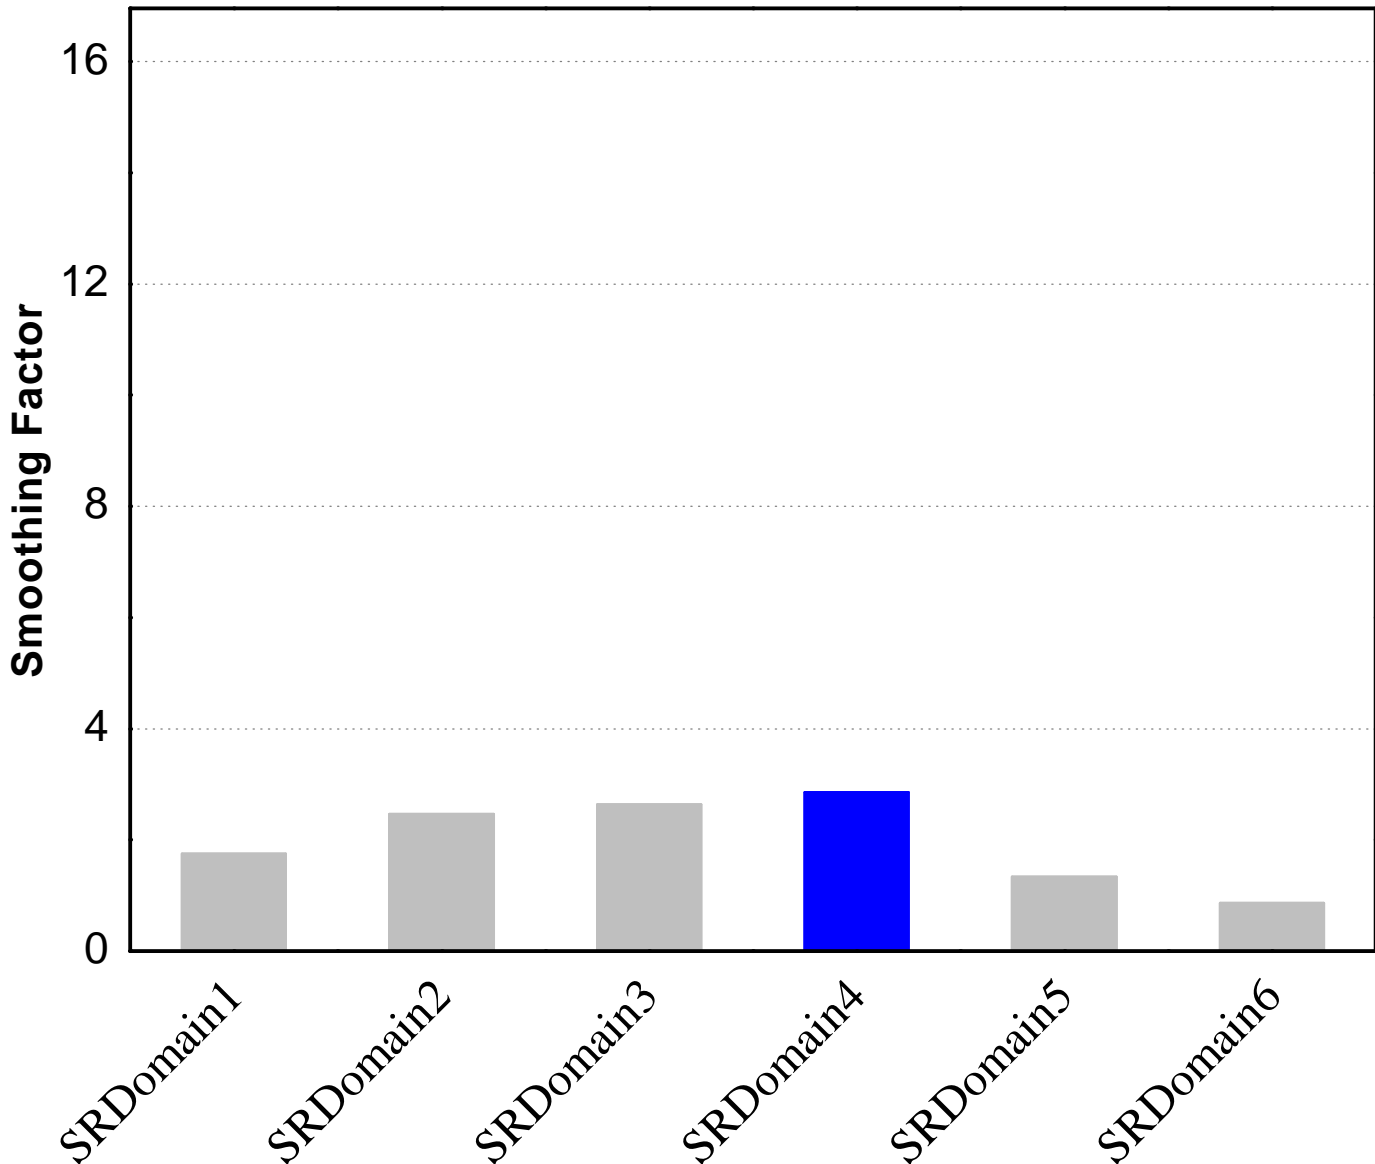

SRDomain1: {0.1} : 1.75

SRDomain2: {0.1, 1.0} : 2.46

SRDomain3: {0.1, 1.0, 0.2} : 2.64

SRDomain4: {0.1, 1.0, 0.2, 0.9} : 2.85

SRDomain5: {0.1, 1.0, 0.2, 0.9, 0.5} : 1.33

SRDomain6: {0.1, 1.0, 0.2, 0.9, 0.5, 0.6} : 0.86
