# Supplementary material for: A mechanism for detecting dishonest recommendation in indirect trust computation
Source: Springer Nature journal article supplement (doi:10.1186/1687-1499-2013-189), 2013-07-13
Supplement: 13638_2012_777_MOESM21_ESM.pdf [file 13638_2012_777_MOESM21_ESM.pdf]

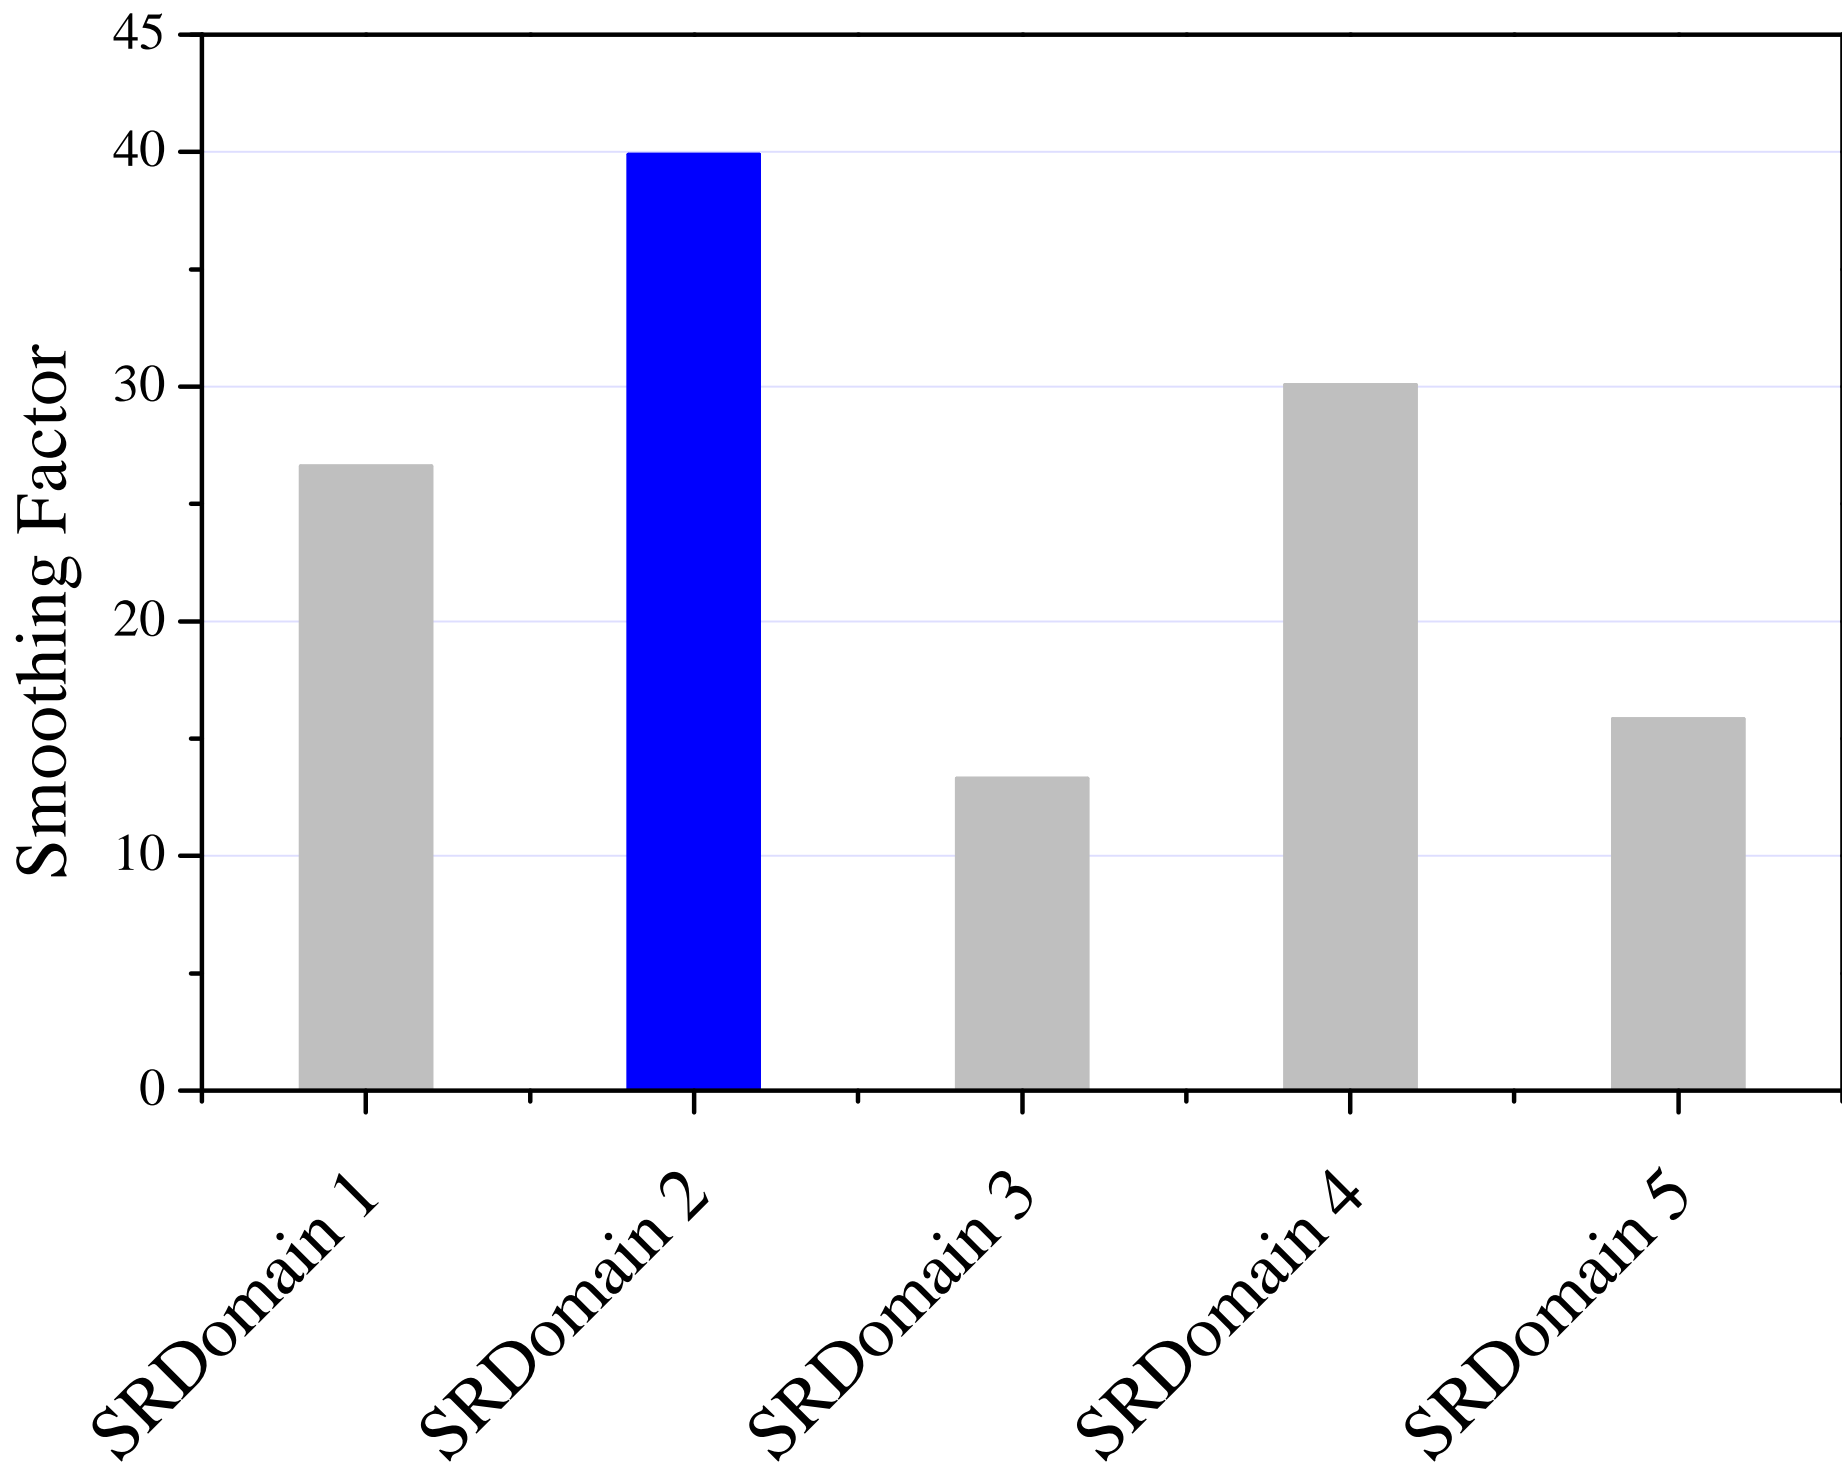

|            |                   |        |
|------------|-------------------|--------|
| SRDomain 1 | {0.9,1.0,0.8,0.1} | 26.62  |
| SRDomain 2 | {0.9,1.0,0.8}     | 39.9   |
| SRDomain 3 | {0.9,0.8,0.1,0.3} | 13.32  |
| SRDomain 4 | {0.9,1.0}         | 30.07  |
| SRDomain 5 | {0.9}             | 15.843 |
