# Supplementary material for: A mechanism for detecting dishonest recommendation in indirect trust computation
Source: Springer Nature journal article supplement (doi:10.1186/1687-1499-2013-189), 2013-07-13
Supplement: 13638_2012_777_MOESM22_ESM.pdf [file 13638_2012_777_MOESM22_ESM.pdf]

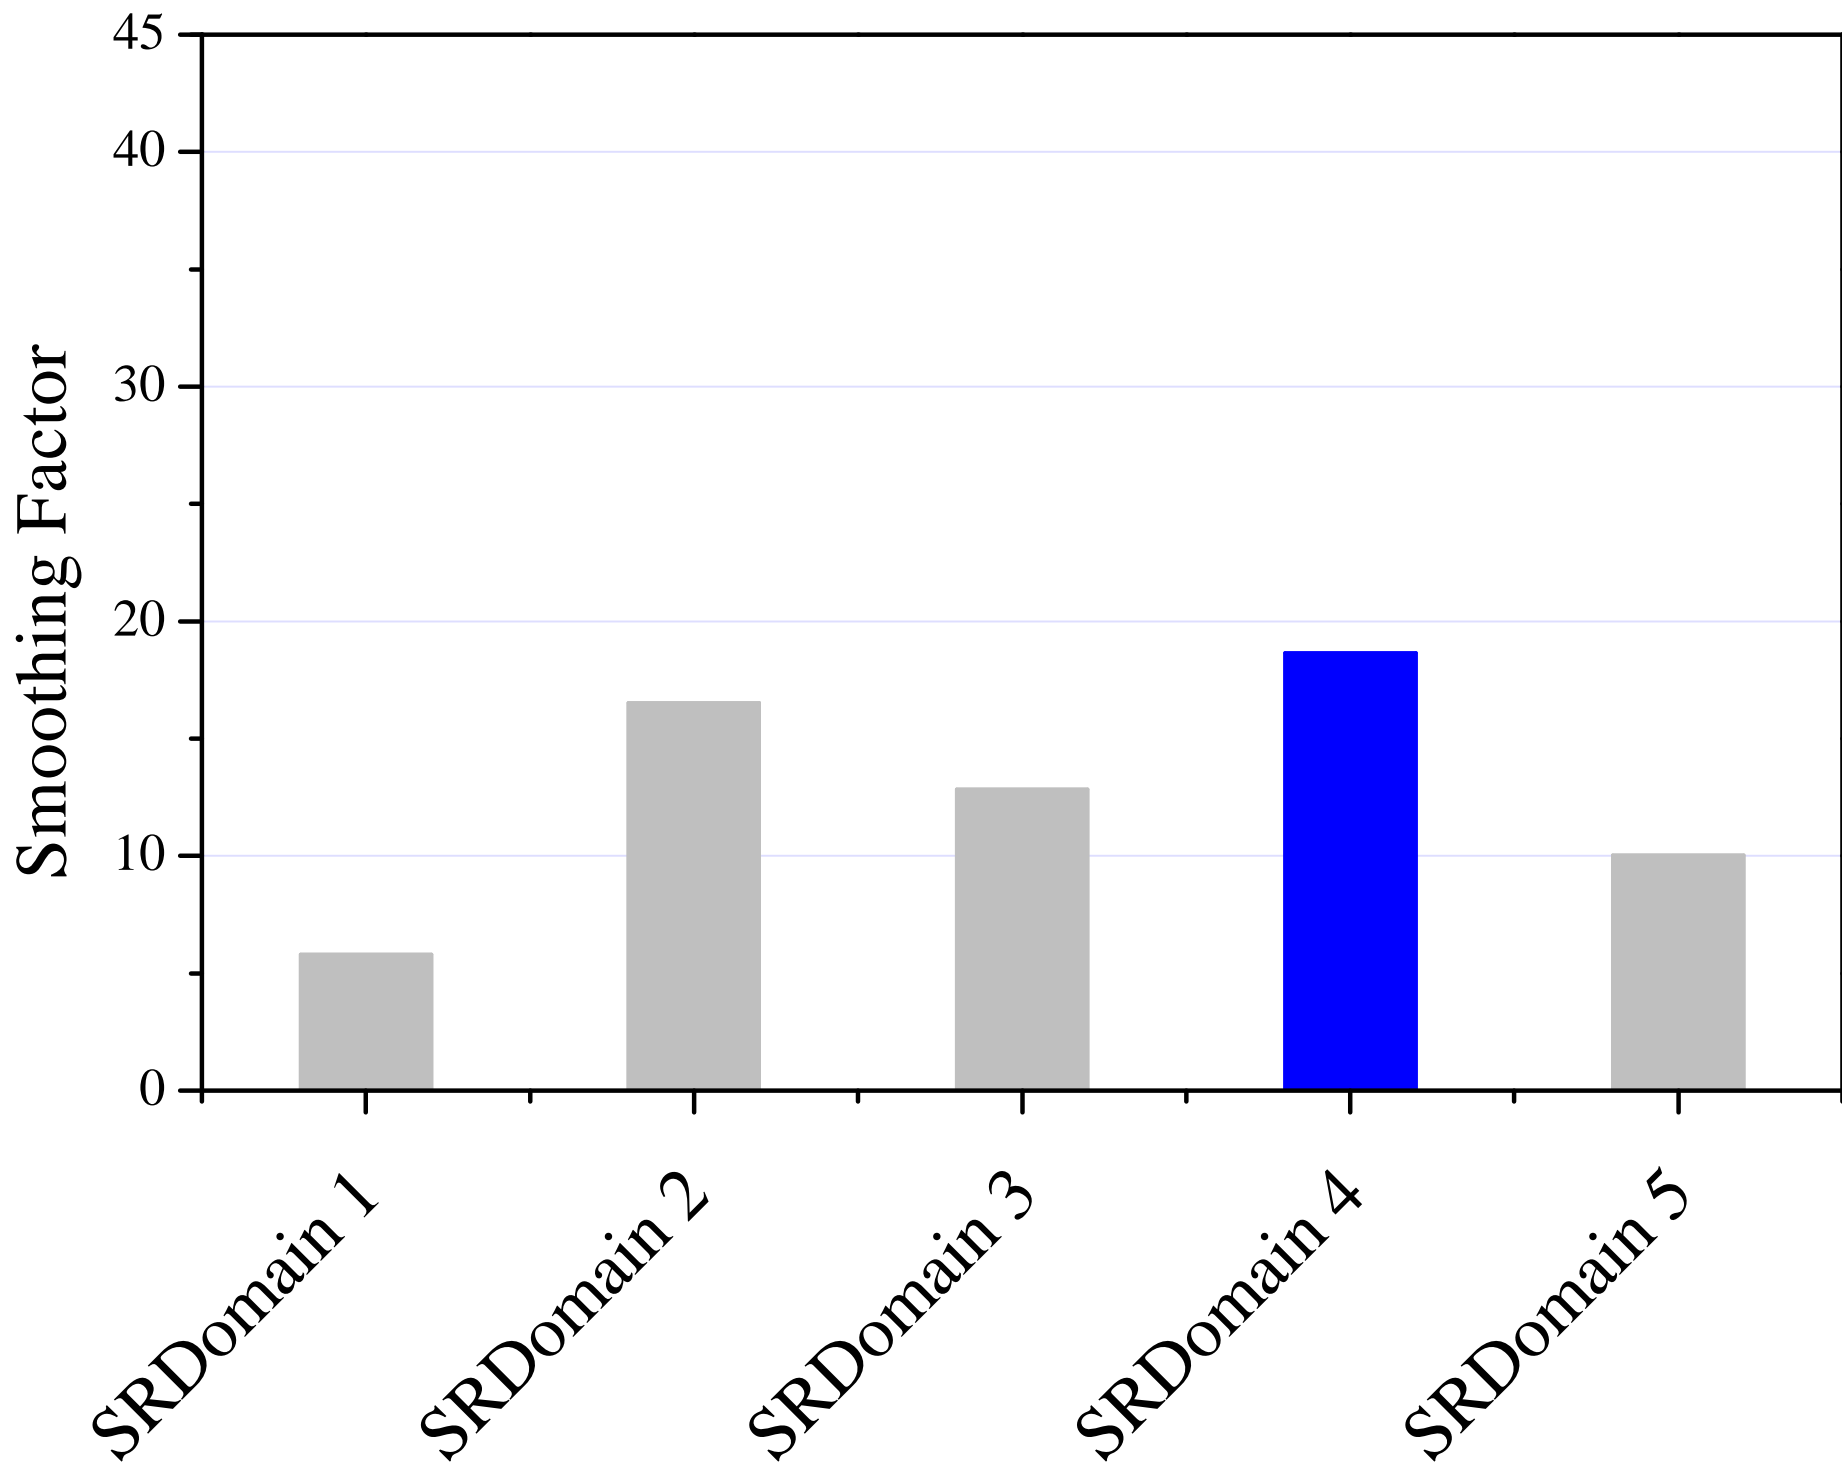

|            |                         |        |
|------------|-------------------------|--------|
| SRDomain 1 | { 1.0,0.9,0.8,0.3,0.1 } | 5.82   |
| SRDomain 2 | { 1.0,0.9 }             | 16.53  |
| SRDomain 3 | { 1.0,0.9,0.8,0.3 }     | 12.852 |
| SRDomain 4 | { 1.0,0.9,0.8 }         | 18.667 |
| SRDomain 5 | { 1.0 }                 | 10.027 |
