# Supplementary material for: A mechanism for detecting dishonest recommendation in indirect trust computation
Source: Springer Nature journal article supplement (doi:10.1186/1687-1499-2013-189), 2013-07-13
Supplement: 13638_2012_777_MOESM24_ESM.pdf [file 13638_2012_777_MOESM24_ESM.pdf]

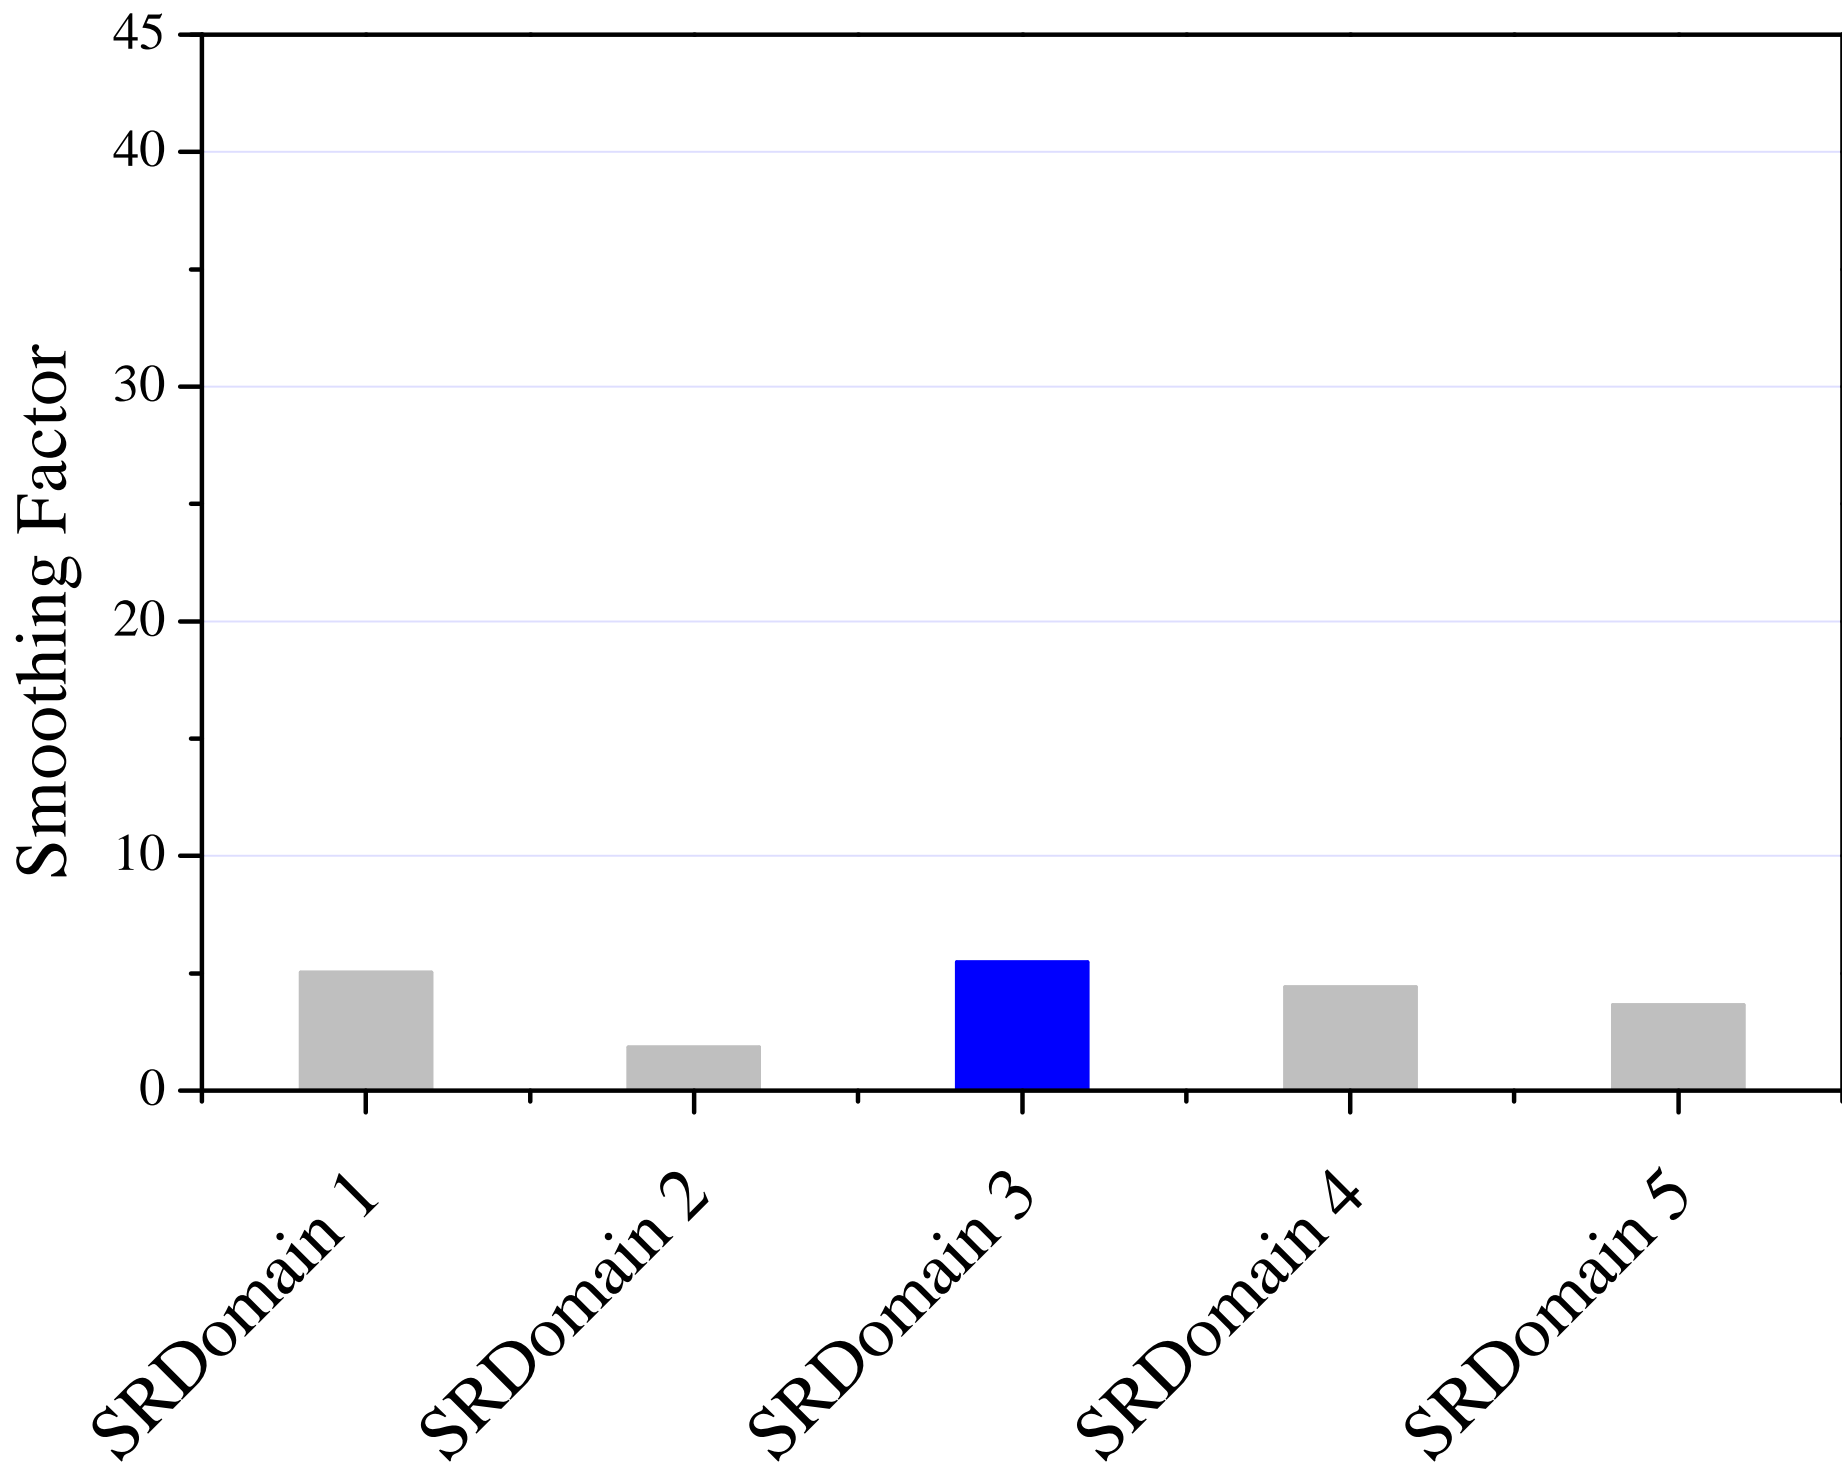

|            |                         |       |
|------------|-------------------------|-------|
| SRDomain 1 | { 1.0,0.9 }             | 5.038 |
| SRDomain 2 | { 1.0,0.9,0.8,0.1,0.2 } | 1.843 |
| SRDomain 3 | { 1.0,0.9,0.8 }         | 5.47  |
| SRDomain 4 | { 1.0 }                 | 4.41  |
| SRDomain 5 | { 1.0,0.9,0.8,0.1 }     | 3.667 |
